# Supplementary material for: N…C and S…S Interactions in Complexes, Molecules, and Transition Structures HN(CH)SX:SCO, for X = F, Cl, NC, CCH, H, and CN
Source: MDPI journal article supplement (doi:10.3390/molecules24183232), 2019-09-05
Supplement: s1 [file s1]

## Supporting Information for

### N $\cdots$ C and S $\cdots$ S Interactions in Complexes, Molecules, and Transition Structures HN(CH)SX:SCO, for X = F, Cl, NC, CCH, H, and CN

Janet E. Del Bene,<sup>a,\*</sup> Ibon Alkorta,<sup>b,\*</sup> José Elguero<sup>b</sup>

|             |                                                                                                                                                                                   |
|-------------|-----------------------------------------------------------------------------------------------------------------------------------------------------------------------------------|
| Pgs. S2-S3: | Table S1. Structures (Å), total energies (a.u.) and molecular graphs of HN(CH)SX:SCO complexes with C <sub>1</sub> symmetry                                                       |
| Pgs. S4-S5: | Table S2. Structures (Å), total energies (a.u.) and molecular graphs of HN(CH)SX:SCO complexes with C <sub>s</sub> symmetry                                                       |
| Pgs. S6-S7: | Table S3. Structures (Å), total energies (a.u.) and molecular graphs of HN(CH)SX:SCO molecules                                                                                    |
| Pgs. S8-S9: | Table S4. Structures (Å), total energies (a.u.) and molecular graphs of HN(CH)SX:SCO transition structures                                                                        |
| Pg. S10:    | Table S5. PSO, DSO, FC, and SD components of <sup>1</sup> tJ(N-C) and <sup>1</sup> cJ(S-S) for complexes, bound molecules, and transition structures with C <sub>s</sub> symmetry |

Table S1. Structures (Å), total energies (a.u.) and molecular graphs of HN(CH)SX:SCO complexes with  $C_1$  symmetry

|                                                                                     |                                                                                                                                                                                                                                                                                                                                                                                                                                                                                                                                                  |
|-------------------------------------------------------------------------------------|--------------------------------------------------------------------------------------------------------------------------------------------------------------------------------------------------------------------------------------------------------------------------------------------------------------------------------------------------------------------------------------------------------------------------------------------------------------------------------------------------------------------------------------------------|
| 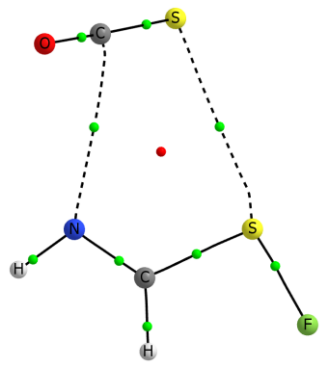   | <p>hnchsf_sco_complex<br/> MP2= -1102.18853592 NIM= 0<br/> C,-0.6737495662,-2.2012722223,0.1645530725<br/> O,0.0532609366,-2.9268096337,0.7169785976<br/> S,-1.6766472384,-1.2436895447,-0.5714897163<br/> N,1.6918437011,-0.4329296105,-0.3938703477<br/> C,1.560761095,0.8154417164,-0.1761502041<br/> S,-0.0118818309,1.5304951395,0.1266985267<br/> F,0.5368481926,3.0523713662,0.3768651143<br/> H,2.3488139606,1.5723381045,-0.1463712087<br/> H,2.6733607497,-0.6558383154,-0.5522138342</p>                                              |
|   | <p>hnchsc1_sco_complex<br/> MP2= -1462.18814858 NIM= 0<br/> C,-0.6923592381,-2.2915930954,0.1533796536<br/> O,0.0737255525,-2.9619502662,0.7243677845<br/> S,-1.7412821452,-1.4070577005,-0.6065270613<br/> N,1.6780357802,-0.4379893331,-0.3952330875<br/> C,1.5873541237,0.8123939283,-0.1800105286<br/> S,-0.0101869908,1.5095375729,0.1114305684<br/> Cl,0.5607083959,3.4382425066,0.4376474273<br/> H,2.3950202421,1.5463124995,-0.1495910041<br/> H,2.6515942799,-0.6977891119,-0.5504637522</p>                                           |
|  | <p>hnchsn1_sco_complex<br/> MP2= -1095.10126112 NIM= 0<br/> C,-0.7005348145,-2.3694582265,0.0511743103<br/> O,0.1152278371,-3.1733114488,0.2738593347<br/> S,-1.816932929,-1.3081469626,-0.2469797248<br/> N,1.6511863137,-0.4221899418,-0.1987426584<br/> C,1.6149827897,0.8425103602,-0.1055645497<br/> S,0.0473990238,1.6186707028,0.191208042<br/> N,0.6066224733,3.1842652828,0.2630250685<br/> H,2.4383166599,1.5547617205,-0.1846916768<br/> H,2.6044911887,-0.7393999663,-0.3720943088<br/> C,0.9418514574,4.3224054797,0.3238061631</p> |

|                                                                                     |                                                                                                                                                                                                                                                                                                                                                                                                                                                                                                                                                                                                    |
|-------------------------------------------------------------------------------------|----------------------------------------------------------------------------------------------------------------------------------------------------------------------------------------------------------------------------------------------------------------------------------------------------------------------------------------------------------------------------------------------------------------------------------------------------------------------------------------------------------------------------------------------------------------------------------------------------|
| 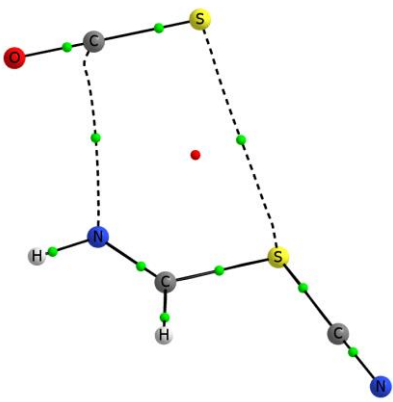   | <p>hnhcscn:sco cis<br/> MP2/aug'-cc-pVTZ= -1095.15217600 NIM= 0<br/> C,2.4199929934,0.1969289269,0.4568714623<br/> O,2.8603698776,1.2799265172,0.4884904382<br/> S,1.8324594079,-1.2540436015,0.4290613475<br/> N,0.144804519,1.6174971991,-0.9769258203<br/> C,-0.9724404353,1.2212324885,-0.5268584171<br/> S,-1.5449181791,-0.3756103009,-1.070868781<br/> C,-3.0034598136,-0.3909863304,-0.2102787847<br/> H,-1.6442847732,1.7321392253,0.1634327174<br/> H,0.3775133739,2.5370080082,-0.60115141<br/> N,-4.0199054856,-0.4198807296,0.3815658843</p>                                          |
|   | <p>hnhscch_sco_complex<br/> MP2= -1079.05835662 NIM= 0<br/> C,2.4226930363,0.2019940394,0.4582025033<br/> O,2.8939687854,1.2722932309,0.4866111315<br/> S,1.7957537097,-1.2321141238,0.4357598273<br/> N,0.1625669426,1.6242259562,-0.9810356403<br/> C,-0.9600100278,1.2219914518,-0.5392486697<br/> S,-1.5576315051,-0.3566654326,-1.077349409<br/> C,-3.0060548403,-0.3959680368,-0.2084111488<br/> H,-1.6279974044,1.7364065759,0.153460286<br/> H,0.3867981071,2.5411537906,-0.5943407163<br/> C,-4.0599553185,-0.4691060487,0.3996904726<br/> H,-4.9790334849,-0.5330784029,0.9296943634</p> |
|  | <p>hnhcsh_sco_complex<br/> MP2= -1003.07649272 NIM= 0<br/> C,1.8401868177,0.4048395797,0.2528756209<br/> O,2.1563399266,1.5148450983,0.0644995737<br/> S,1.4337424868,-1.0839670627,0.5161671165<br/> N,-0.8023316074,1.2917375902,-0.8981857995<br/> C,-1.8470145358,0.8158146162,-0.3419338303<br/> S,-2.221844445,-0.8899930558,-0.5384795195<br/> H,-3.3488713611,-0.8526838351,0.1801621361<br/> H,-2.55393354,1.3792434868,0.2675654599<br/> H,-0.7187327417,2.2867165823,-0.6910147578</p>                                                                                                  |

Table S2. Structures (Å), total energies (a.u.) and molecular graphs of HN(CH)SX:SCO complexes with  $C_s$  symmetry

|                                                                                     |                                                                                                                                                                                                                                                                                                                                                                                                                                           |
|-------------------------------------------------------------------------------------|-------------------------------------------------------------------------------------------------------------------------------------------------------------------------------------------------------------------------------------------------------------------------------------------------------------------------------------------------------------------------------------------------------------------------------------------|
| 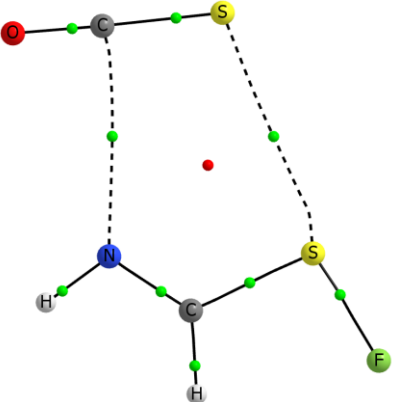   | <p>hnchsf_sco_complex<br/> MP2= -1102.18845511 NIM= 1<br/> C,1.9199943898,-0.611200373,0.<br/> O,2.7901716149,0.165112193,0.<br/> S,0.7763398217,-1.6866408715,0.<br/> N,0.0484660751,1.7389333927,0.<br/> C,-1.2234788261,1.6671397561,0.<br/> S,-2.0436047254,0.1183862475,0.<br/> F,-3.5642190488,0.7224074973,0.<br/> H,-1.9382137244,2.4941736145,0.<br/> H,0.3418534232,2.7146735433,0.</p>                                         |
|   | <p>hnchsc1_sco_complex<br/> MP2= -1462.18813028 NIM= 1<br/> C,-0.0411475472,-2.8511648733,0.<br/> O,0.9641324133,-3.4439750339,0.<br/> S,-1.4083573103,-2.0825083712,0.<br/> N,1.7319688777,-0.3678079423,0.<br/> C,1.3805519378,0.8546096287,0.<br/> S,-0.3433334243,1.2396187936,0.<br/> Cl,-0.1986435192,3.2716152358,0.<br/> H,2.0244835791,1.7362810425,0.<br/> H,2.7487241231,-0.4423339499,0.</p>                                  |
|  | <p>hnchsn1_sco_complex<br/> MP2= -1095.10125561 NIM= 1<br/> C,2.7909659225,0.0351406968,0.<br/> O,3.3326268544,1.0685203331,0.<br/> S,2.089021074,-1.367932566,0.<br/> N,0.2274102038,1.7057841401,0.<br/> C,-0.9786362191,1.3123531886,0.<br/> S,-1.2923577592,-0.4337191999,0.<br/> N,-2.9537375014,-0.3419887779,0.<br/> H,-1.8905217838,1.9123274895,0.<br/> H,0.2702664322,2.7244027264,0.<br/> C,-4.1417541084,-0.3445680625,0.</p> |

|                                                                                     |                                                                                                                                                                                                                                                                                                                                                                                                                                                                                   |
|-------------------------------------------------------------------------------------|-----------------------------------------------------------------------------------------------------------------------------------------------------------------------------------------------------------------------------------------------------------------------------------------------------------------------------------------------------------------------------------------------------------------------------------------------------------------------------------|
| 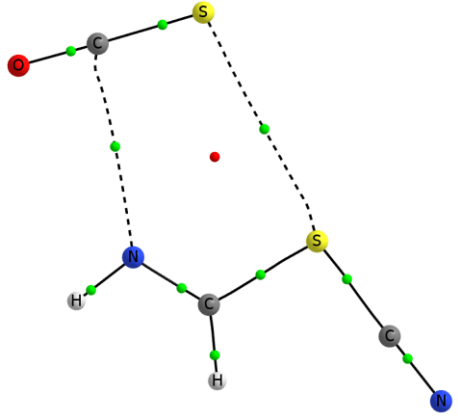   | <p>hnhscn_sco_complex<br/> MP2= -1095.15209109 NIM= 1<br/> C,2.8363338618,0.0520420714,0.<br/> O,3.3394141043,1.1054432049,0.<br/> S,2.185568671,-1.3745237355,0.<br/> N,0.2199812178,1.667546745,0.<br/> C,-0.9930093614,1.2989600964,0.<br/> S,-1.3237014804,-0.454225243,0.<br/> C,-3.0148706138,-0.3446491173,0.<br/> H,-1.8872889443,1.9228005532,0.<br/> H,0.2810039429,2.6858049148,0.<br/> N,-4.1901482829,-0.2888795217,0.</p>                                           |
|   | <p>hnhscch_sco_complex<br/> MP2= -1079.05817922 NIM= 1<br/> C,2.8499161047,0.0588550591,0.<br/> O,3.3553554619,1.1115709409,0.<br/> S,2.1987189963,-1.3668386547,0.<br/> N,0.2359967458,1.6635413005,0.<br/> C,-0.9804692784,1.2939493801,0.<br/> S,-1.3457418092,-0.4419173124,0.<br/> C,-3.0329496815,-0.3409959917,0.<br/> H,-1.8681096586,1.9286793753,0.<br/> H,0.2922737051,2.6818479305,0.<br/> C,-4.2517074712,-0.3183720594,0.<br/> H,-5.3144243049,-0.2994035581,0.</p> |
|  | <p>hnhsh_sco_complex<br/> MP2= -1003.07630771 NIM= 1<br/> C,1.7320890987,-0.646017749,0.<br/> O,2.3572953422,0.340510009,0.<br/> S,0.9205334934,-1.9865131691,0.<br/> N,-0.6716846835,1.2532005561,0.<br/> C,-1.9322723803,1.0584698426,0.<br/> S,-2.5549533518,-0.5865501108,0.<br/> H,-3.8425676262,-0.2250146688,0.<br/> H,-2.6926039885,1.8398614301,0.<br/> H,-0.4762286941,2.2538528698,0.</p>                                                                              |

Table S3. Structures (Å), total energies (a.u.) and molecular graphs of HN(CH)SX:SCO molecules

|                                                                                     |                                                                                                                                                                                                                                                                                                                                                                                                                                          |
|-------------------------------------------------------------------------------------|------------------------------------------------------------------------------------------------------------------------------------------------------------------------------------------------------------------------------------------------------------------------------------------------------------------------------------------------------------------------------------------------------------------------------------------|
| 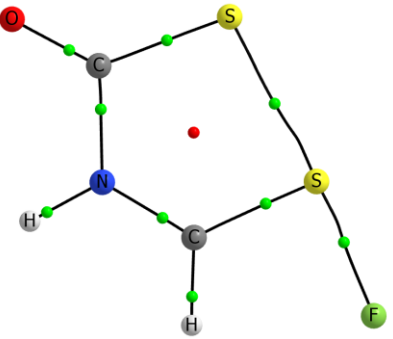   | <p>hnchsf_sco_molecule<br/> MP2= -1102.20092699 NIM= 0<br/> C,0.1063964564,1.350975688,0.<br/> O,0.231183774,2.5570439469,0.<br/> S,-1.3001833888,0.3511348492,0.<br/> N,1.273162898,0.5132232652,0.<br/> C,1.2034918558,-0.8048855171,0.<br/> S,-0.2173990149,-1.6692778057,0.<br/> F,0.7599321918,-3.1780207589,0.<br/> H,2.1165081114,-1.3843848435,0.<br/> H,2.1723601163,0.984028176,0.</p>                                         |
|   | <p>hnchsl_sco_molecule<br/> MP2= -1462.1917678 NIM= 0<br/> C,0.1161868026,1.4166332426,0.<br/> O,0.2716247517,2.6174942145,0.<br/> S,-1.3259788568,0.4641802164,0.<br/> N,1.2615645574,0.5475908076,0.<br/> C,1.1688783233,-0.7678480425,0.<br/> S,-0.2783576407,-1.5987588241,0.<br/> Cl,0.8865985927,-3.5942712801,0.<br/> H,2.072658111,-1.3624128292,0.<br/> H,2.1722783589,0.9972294949,0.</p>                                      |
|  | <p>hnchsnc_sco_molecule<br/> MP2= -1095.0922502 NIM= 0<br/> C,0.0787267131,1.3895684502,0.<br/> O,0.1817233793,2.5945067875,0.<br/> S,-1.310846511,0.3648462023,0.<br/> N,1.2684353517,0.5725842376,0.<br/> C,1.2381702521,-0.7414880446,0.<br/> S,-0.1791902297,-1.6307590838,0.<br/> N,0.9488179833,-3.2300599251,0.<br/> H,2.1675940612,-1.2945402088,0.<br/> H,2.1571375029,1.0651968332,0.<br/> C,1.2948844973,-4.3700182485,0.</p> |

|                                                                                     |                                                                                                                                                                                                                                                                                                                                                                                                                                                                           |
|-------------------------------------------------------------------------------------|---------------------------------------------------------------------------------------------------------------------------------------------------------------------------------------------------------------------------------------------------------------------------------------------------------------------------------------------------------------------------------------------------------------------------------------------------------------------------|
| 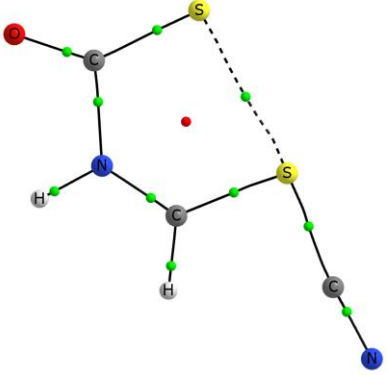   | <p>hnhscn_sco_molecule<br/> MP2= -1095.1204361 NIM= 0<br/> C,0.009571444,1.4320832404,0.<br/> O,0.3186794481,2.6047735328,0.<br/> S,-1.4221442279,0.5529594587,0.<br/> N,1.220090029,0.5082739778,0.<br/> C,1.2407023746,-0.7857947808,0.<br/> S,-0.1442472918,-1.7938030826,0.<br/> C,0.8717807877,-3.2461208971,0.<br/> H,2.2063599189,-1.2772290275,0.<br/> H,2.1099169207,1.004490613,0.<br/> N,1.4347435968,-4.2797960346,0.</p>                                     |
|   | <p>hnhscch_sco_molecule<br/> MP2= -1079.02817534 NIM= 0<br/> C,-0.012510738,1.4593382669,0.<br/> O,0.3317865051,2.625147803,0.<br/> S,-1.454385114,0.6115119459,0.<br/> N,1.2028977269,0.5196595892,0.<br/> C,1.2475925176,-0.7746995867,0.<br/> S,-0.0920458612,-1.83817435,0.<br/> C,0.889233472,-3.2642518021,0.<br/> H,2.2237948352,-1.245901089,0.<br/> H,2.0872569947,1.0248105726,0.<br/> C,1.4394293875,-4.3525142537,0.<br/> H,1.9324032742,-5.2950900959,0.</p> |
|  | <p>hnhsh_sco_molecule<br/> MP2= -1003.04696789 NIM= 0<br/> C,-1.35774839,0.17159005,0.<br/> O,-2.45793305,0.68937447,0.<br/> S,-0.73573469,-1.37730904,0.<br/> N,-0.25179916,1.25422975,0.<br/> C,1.03884101,1.14390843,0.<br/> S,1.94147986,-0.30217892,0.<br/> H,3.08959592,0.42288161,0.<br/> H,1.60315247,2.06829798,0.<br/> H,-0.64516836,2.19303285,0.</p>                                                                                                          |

Table S4. Structures (Å), total energies (a.u.) and molecular graphs of HN(CH)SX:SCO transition structures

|                                                                                     |                                                                                                                                                                                                                                                                                                                                                                                                                                     |
|-------------------------------------------------------------------------------------|-------------------------------------------------------------------------------------------------------------------------------------------------------------------------------------------------------------------------------------------------------------------------------------------------------------------------------------------------------------------------------------------------------------------------------------|
| 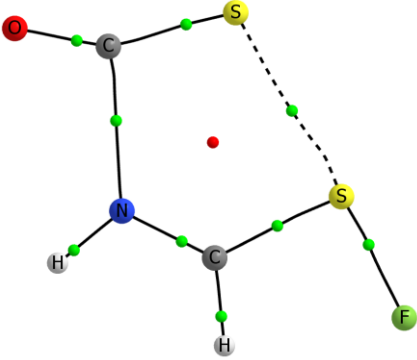   | <p>hnchsf_sco TS<br/> MP2= -1102.17544713 NIM= 1<br/> C,0.0608423,-1.94405723,0.<br/> O,0.66399223,-2.9498708,0.<br/> S,-1.29320703,-1.05383991,0.<br/> N,1.4626025,-0.46807969,0.<br/> C,1.13380193,0.76849725,0.<br/> S,-0.46972481,1.42721692,0.<br/> F,0.12879968,3.00045113,0.<br/> H,1.86078351,1.58010479,0.<br/> H,2.46890802,-0.6293129,0.</p>                                                                             |
|   | <p>hnchscf_sco TS<br/> MP2= -1462.16840470 NIM= 1<br/> C,0.12700093,-2.31974361,0.<br/> O,0.76871742,-3.30552958,0.<br/> S,-1.29818323,-1.53716223,0.<br/> N,1.41858786,-0.83596943,0.<br/> C,1.09844807,0.40374586,0.<br/> S,-0.53089991,1.02677632,0.<br/> Cl,0.0922804,3.04548007,0.<br/> H,1.84145033,1.19805858,0.<br/> H,2.42256478,-1.01303605,0.</p>                                                                        |
|  | <p>hnchsnf_sco TS<br/> MP2= -1095.07701872 NIM= 1<br/> C,0.1730483003,-2.139196054,0.<br/> O,0.8135815925,-3.1311381818,0.<br/> S,-1.2973618812,-1.4251132347,0.<br/> N,1.3824372683,-0.7047555131,0.<br/> C,1.0760088642,0.5356072929,0.<br/> S,-0.5508564413,1.1694720215,0.<br/> N,0.0251400337,2.7913531271,0.<br/> H,1.8296451234,1.3189296148,0.<br/> H,2.3799644125,-0.9148899031,0.<br/> C,0.2509527276,3.9584263503,0.</p> |



|                                                                                     |                                                                                                                                                                                                                                                                                                                                                                                                                                                                    |
|-------------------------------------------------------------------------------------|--------------------------------------------------------------------------------------------------------------------------------------------------------------------------------------------------------------------------------------------------------------------------------------------------------------------------------------------------------------------------------------------------------------------------------------------------------------------|
| 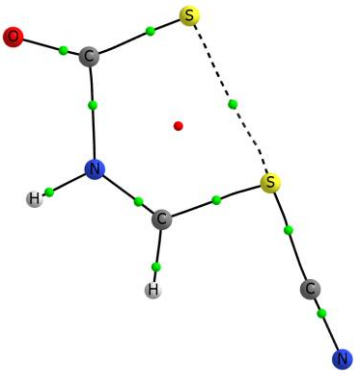   | <p>hnhscn_sco TS<br/> MP2= -1095.11902037 NIM= 1<br/> C,0.2462561989,-2.0721796613,0.<br/> O,0.921117524,-3.0585386876,0.<br/> S,-1.3119178862,-1.5367062575,0.<br/> N,1.2994690249,-0.7129358278,0.<br/> C,1.0291081911,0.5392586882,0.<br/> S,-0.5808995851,1.2053291466,0.<br/> C,0.0173114313,2.8324688387,0.<br/> H,1.8315420202,1.2703846537,0.<br/> H,2.2858949426,-0.9708087972,0.<br/> N,0.3446781382,3.9624234244,0.</p>                                 |
|   | <p>hnhscch_sco TS<br/> MP2= -1079.02704899 NIM= 1<br/> C,0.2636861431,-2.1200605692,0.<br/> O,0.9743241644,-3.0839767314,0.<br/> S,-1.3098836561,-1.6410426669,0.<br/> N,1.2862433521,-0.7345798379,0.<br/> C,1.011635139,0.5199196695,0.<br/> S,-0.5809514086,1.20527495,0.<br/> C,-0.0335379315,2.8287437433,0.<br/> H,1.8150905986,1.25074617,0.<br/> H,2.2739554527,-0.9853240094,0.<br/> C,0.2379814717,4.0170156219,0.<br/> H,0.4833905144,5.05189587,0.</p> |
|  | <p>hnhsh_sco TS<br/> MP2= -1003.04605350 NIM= 1<br/> C,0.16321793,-1.43822369,0.<br/> O,0.80530004,-2.45067152,0.<br/> S,-1.37485005,-0.85768913,0.<br/> N,1.29186504,-0.13777209,0.<br/> C,1.13951492,1.13957109,0.<br/> S,-0.36602918,1.97742089,0.<br/> H,0.27636136,3.16306297,0.<br/> H,2.02574837,1.76530447,0.<br/> H,2.25010531,-0.4823831,0.</p>                                                                                                          |

Table S5. PSO, DSO, FC, and SD components of  $^{1t}\text{J}(\text{N-C})$  and  $^{1c}\text{J}(\text{S-S})$  (Hz) for complexes, bound molecules, and transition structures with  $\text{C}_s$  symmetry

| Complexes |      |      |      |      |                             |
|-----------|------|------|------|------|-----------------------------|
| X =       | PSO  | DSO  | FC   | SD   | $^{1t}\text{J}(\text{N-C})$ |
| F         | 0.0  | 0.0  | -0.3 | 0.0  | -0.3                        |
| Cl        | 0.0  | 0.0  | -0.3 | 0.0  | -0.3                        |
| NC        | 0.0  | 0.0  | -0.3 | 0.0  | -0.3                        |
| CCH       | 0.0  | 0.0  | -0.3 | 0.0  | -0.3                        |
| H         | 0.0  | 0.0  | -0.3 | 0.0  | -0.3                        |
| CN        | 0.0  | 0.0  | -0.3 | 0.0  | -0.3                        |
|           |      |      |      |      |                             |
|           |      |      |      |      | $^{1c}\text{J}(\text{S-S})$ |
| F         | 0.1  | 0.0  | 5.7  | 0.0  | 5.7                         |
| Cl        | 0.0  | 0.0  | 3.8  | 0.0  | 3.8                         |
| NC        | 0.0  | 0.0  | 3.6  | 0.0  | 3.6                         |
| CCH       | 0.0  | 0.0  | 2.1  | 0.0  | 2.1                         |
| H         | 0.0  | 0.0  | 1.5  | 0.0  | 1.4                         |
| CN        | 0.0  | 0.0  | 2.3  | 0.0  | 2.3                         |
| Molecules |      |      |      |      |                             |
|           | PSO  | DSO  | FC   | SD   | $^1\text{J}(\text{N-C})$    |
| X = F     | 1.7  | -0.2 | -9.0 | -0.3 | -7.8                        |
| Cl        | 1.6  | -0.2 | -8.8 | -0.3 | -7.6                        |
|           |      |      |      |      |                             |
| TS        |      |      |      |      | $^{1t}\text{J}(\text{N-C})$ |
| X = F     | 0.2  | -0.1 | 17.9 | -0.1 | 17.9                        |
| Cl        | 0.2  | -0.1 | 21.1 | -0.2 | 21.0                        |
| Molecules |      |      |      |      |                             |
|           | PSO  | DSO  | FC   | SD   | $^{1c}\text{J}(\text{S-S})$ |
| X = F     | -1.3 | 0.0  | 13.5 | 0.9  | 13.1                        |
| Cl        | -0.5 | 0.0  | 11.7 | 1.5  | 12.7                        |
| TS        |      |      |      |      |                             |
| F         | 0.0  | 0.0  | 22.6 | 0.1  | 22.7                        |
| Cl        | 0.0  | 0.0  | 21.5 | 0.0  | 21.5                        |
